# Supplementary material
Source: PubMed Central journal article supplement (PMC4424028)
Supplement: supp_pp.15.00138_138Figure_S3_NEW.pdf [file supp_pp.15.00138_138Figure_S3_NEW.pdf]

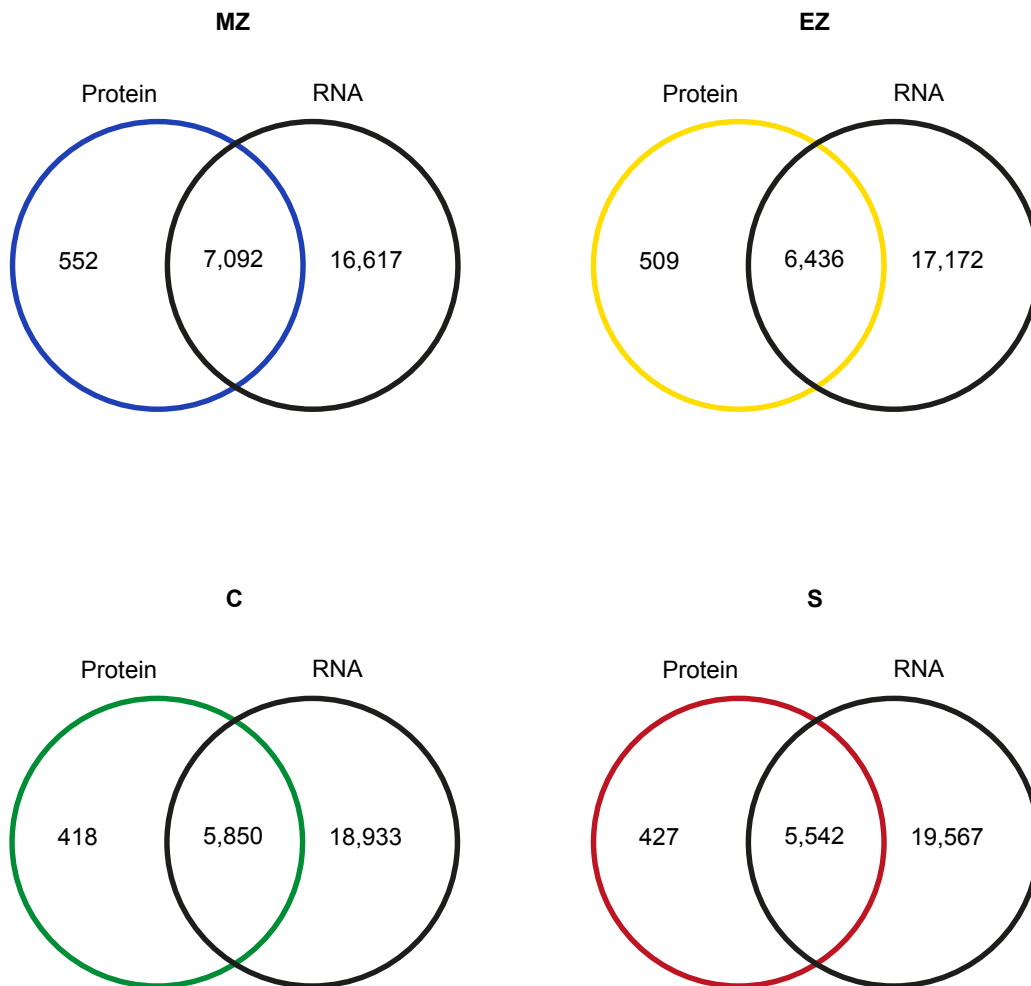

Figure S3. Number of gene accessions identified among nonmodified proteins and transcripts (Paschold et al., 2014). MZ: meristematic zone, EZ: elongation zone, C: cortex, S: stele.
