# Supplementary material
Source: PubMed Central journal article supplement (PMC4424028)
Supplement: supp_pp.15.00138_138Figure_S4_NEW.pdf [file supp_pp.15.00138_138Figure_S4_NEW.pdf]

### A) Bin 30: Signaling

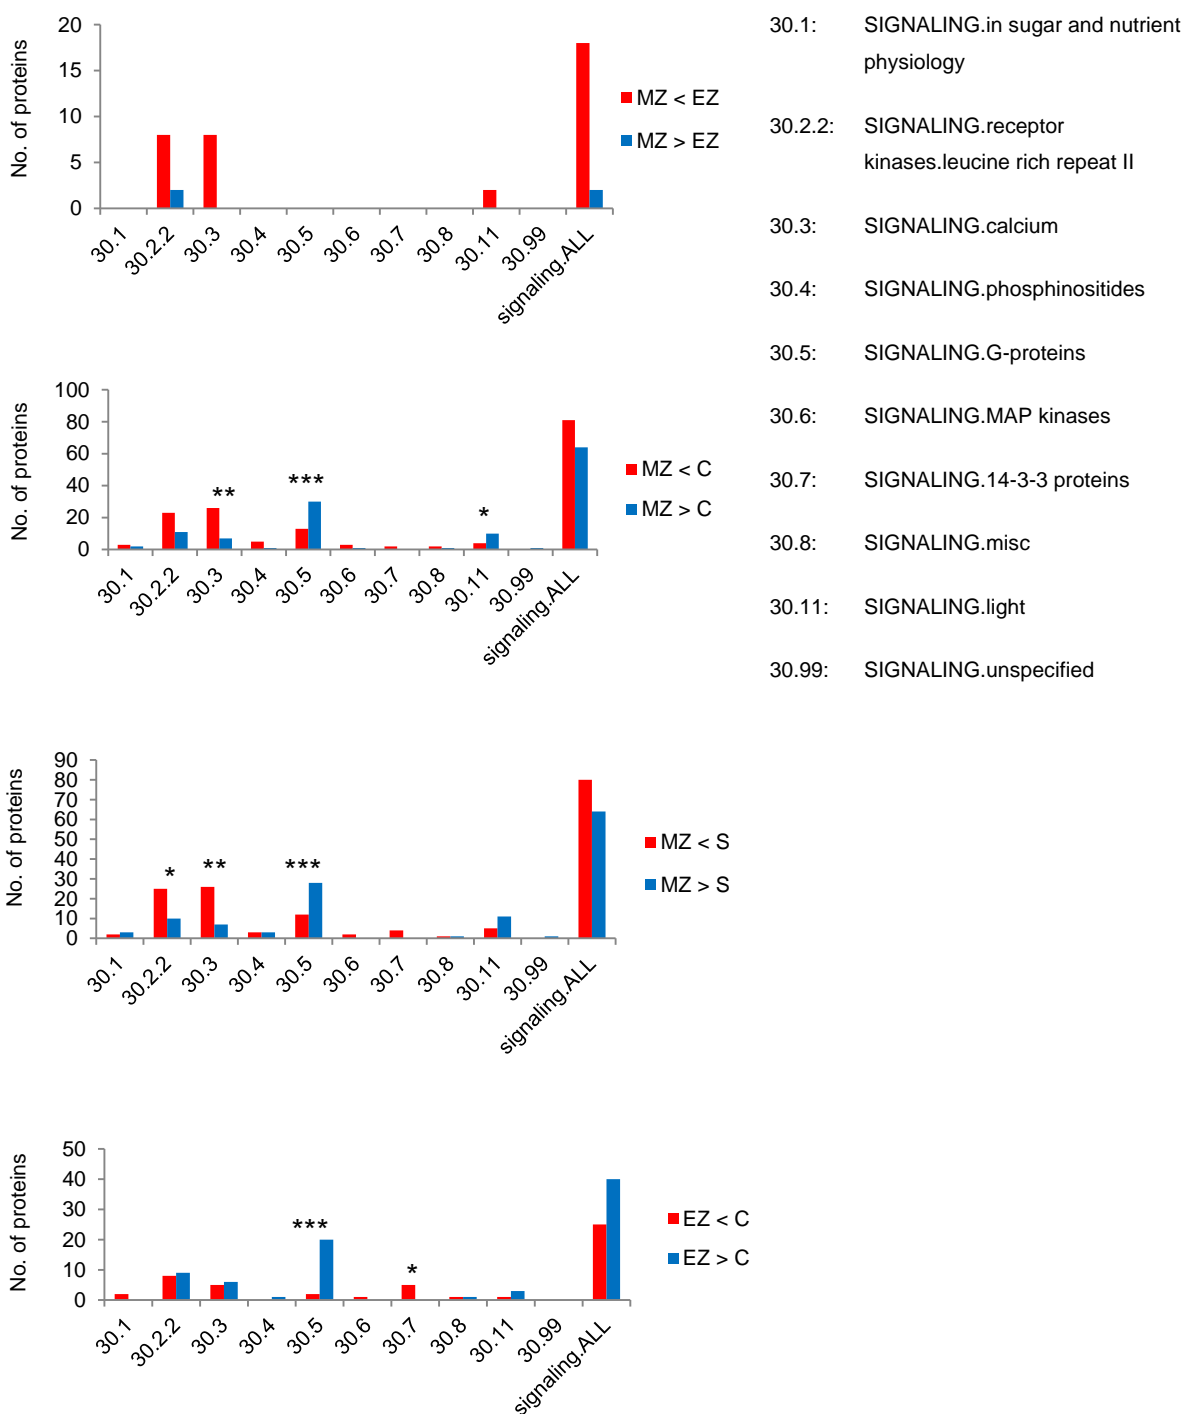

Figure S4. Distribution of differentially accumulated nonmodified proteins in six pairwise comparisons of the four primary root tissues in the Mapman bins (A) 30 "signaling" and (B) 31 "cell". Asterisks indicate significant differences of protein accumulation in distinct sub bins compared to the expected ratio of all proteins to the corresponding main bin, "signaling" or "cell" 1: \*:  $p \leq 0.05$ ; \*\*:  $p \leq 0.01$ ; \*\*\*:  $p \leq 0.001$ .

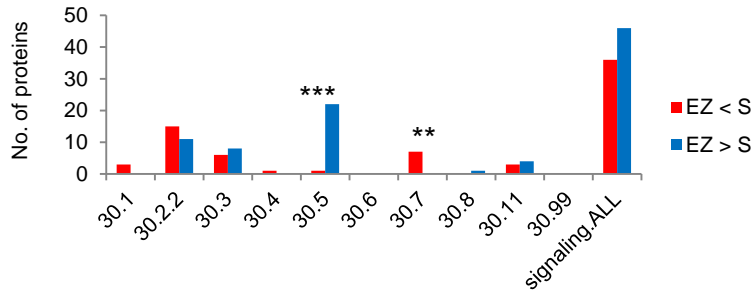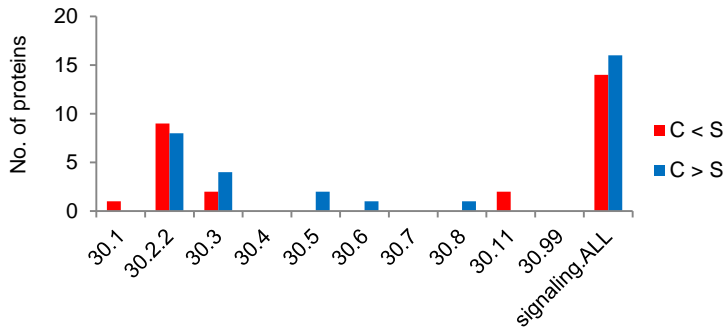

B) Bin 31: Cell

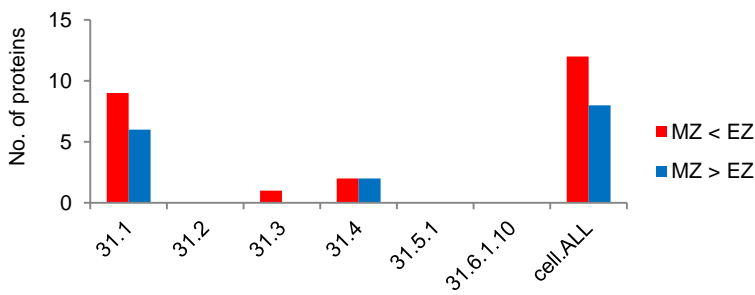

- 31.1: CELL.organization
- 31.2: CELL.division
- 31.3: CELL.cycle
- 31.4: CELL.vesicle transport
- 31.5.1: CELL.cell death.plants
- 31.6.1.10: CELL.motility. eukaryotes.flagellar associated proteins

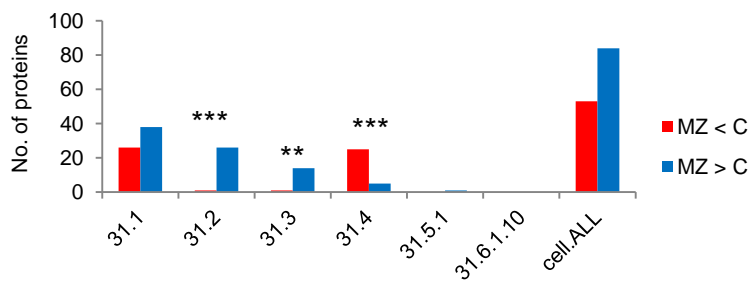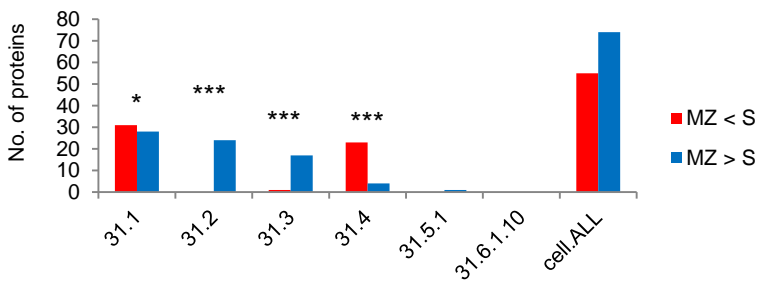

Figure S3 continued.

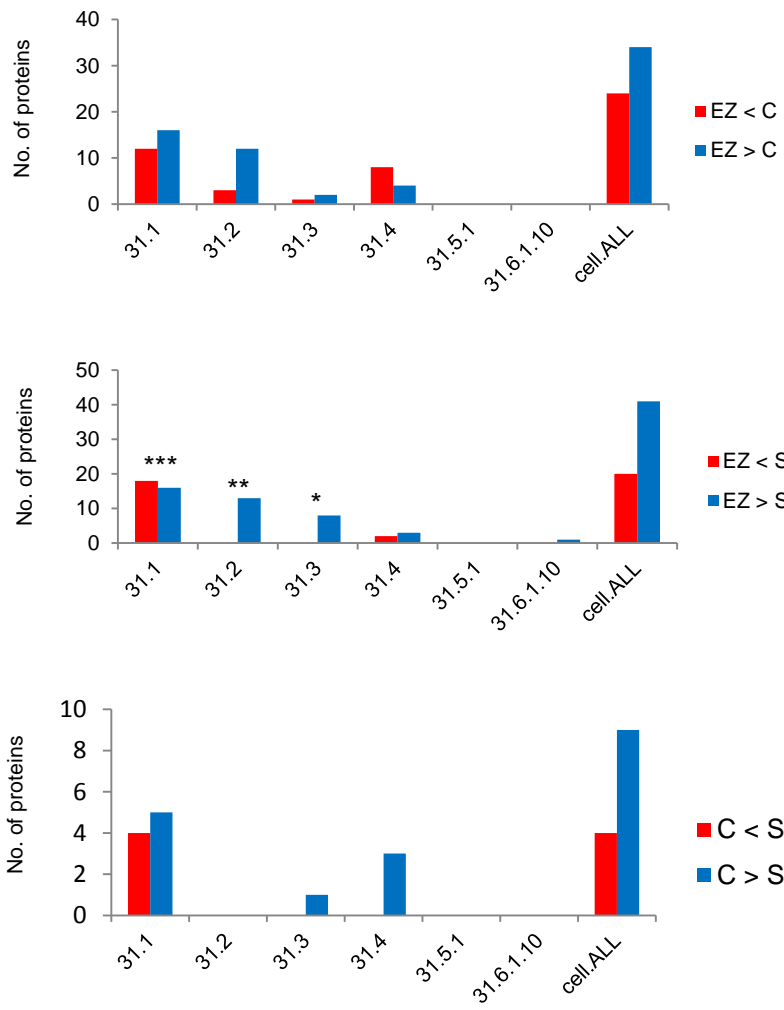

Figure S3 continued.
