# Supplementary material
Source: PubMed Central journal article supplement (PMC4424028)
Supplement: supp_pp.15.00138_138Figure_S5NEW.pdf [file supp_pp.15.00138_138Figure_S5NEW.pdf]

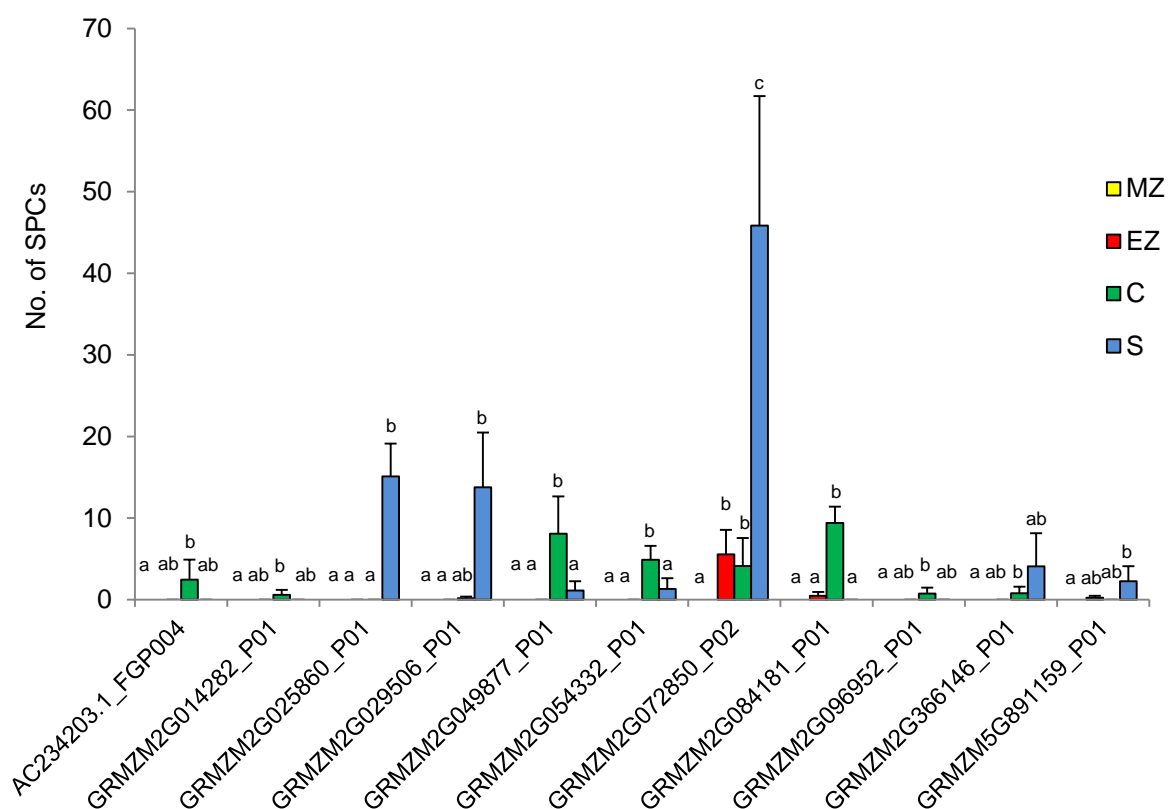

Figure S5. Preferential accumulation of 11 ABC transporters in cortex and stele of primary roots. For each protein the normalized mean value of spectral counts (SPCs) are illustrated per tissue. Differential accumulation of ABC transporters between the tissues are indicated by a, ab, b, c.
