# Supplementary material
Source: PubMed Central journal article supplement (PMC4424028)
Supplement: supp_pp.15.00138_00138R1_Supplemental_Figure_1.pdf [file supp_pp.15.00138_00138R1_Supplemental_Figure_1.pdf]

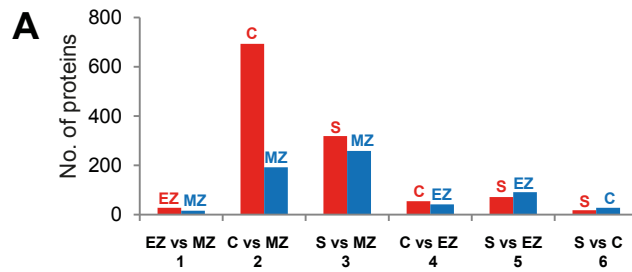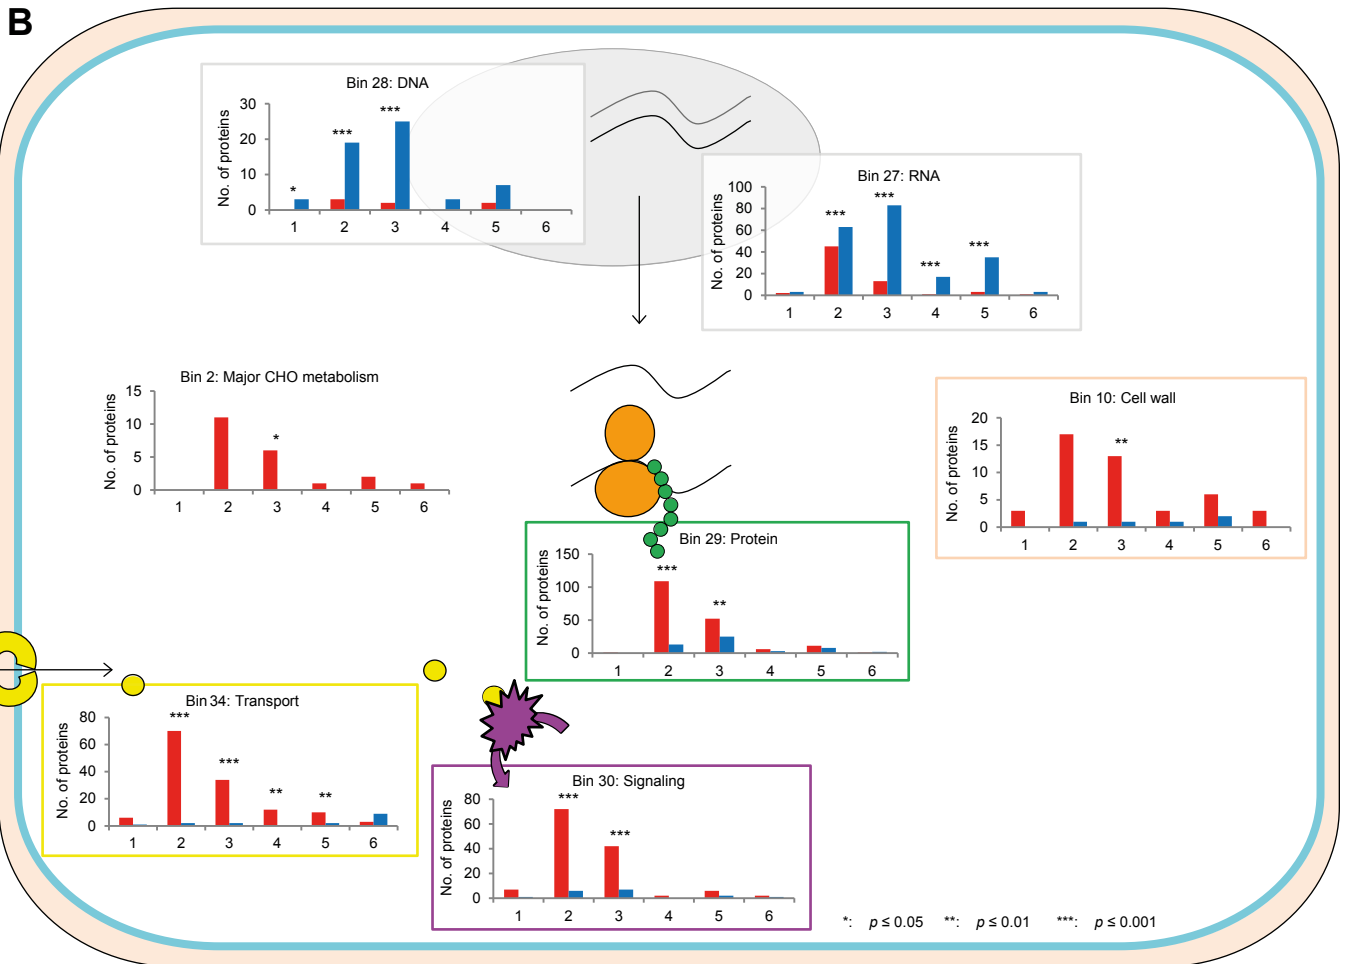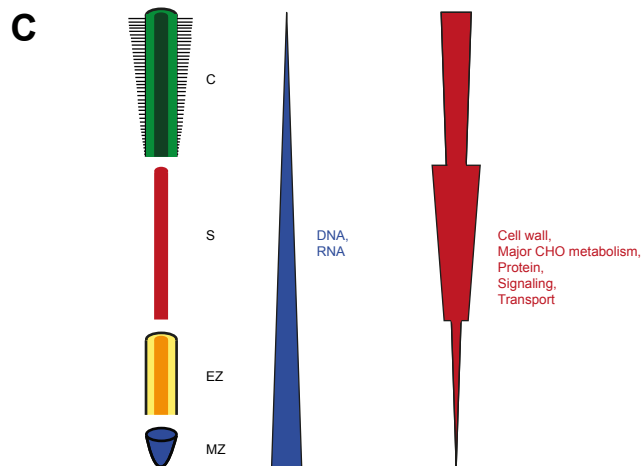

Figure S1. Number of up and downregulated phosphorylated proteins resulting from six pairwise comparisons of the four maize primary root tissues. (A) Total number of up and downregulated phosphoproteins mapped to the 35 MapMan bins in the six comparisons. Blue and red bars in each comparison indicate the number of genes preferentially expressed in the tissue indicated on top of the bars. (B) Only functional classes (MapMan bins) in which the ratio of up and downregulated proteins differ significantly from the expected value (see A) in at least 1 tissue comparison are shown. Numbering and bar colors according to Figure 1. \*:  $p \leq 0.05$ ; \*\*:  $p \leq 0.01$ ; \*\*\*:  $p \leq 0.001$ . (C) Tissue-specific protein accumulation trends based on the results displayed in (B). MZ: meristematic zone, EZ: elongation zone, C: cortex, S: stele.
