# Supplementary material
Source: PubMed Central journal article supplement (PMC4424028)
Supplement: supp_pp.15.00138_00138R1_Supplemental_Figure_2.pdf [file supp_pp.15.00138_00138R1_Supplemental_Figure_2.pdf]

## Nonmodified proteins

## Phosphorylated proteins

all 35 bins

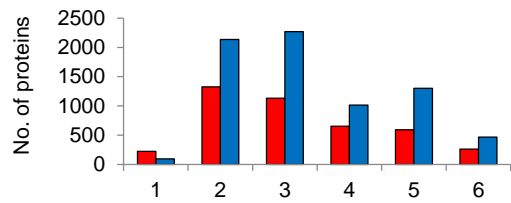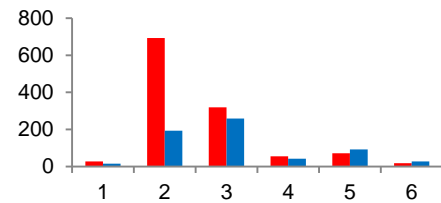

bin 1 - photosynthesis

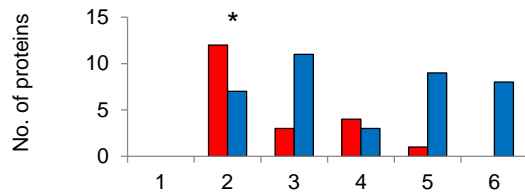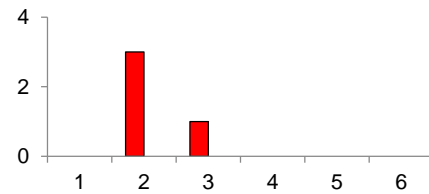

bin 2 – major CHO metabolism

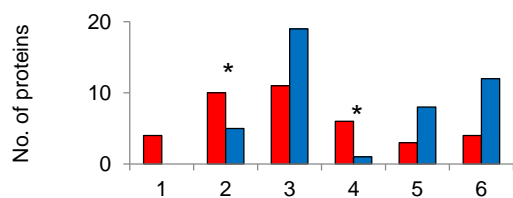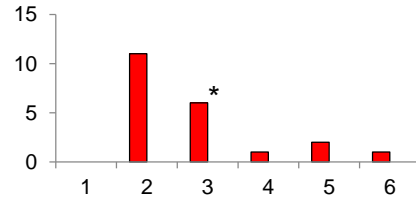

bin 3 – minor CHO metabolism

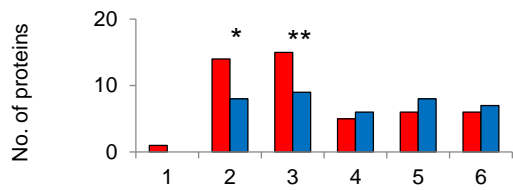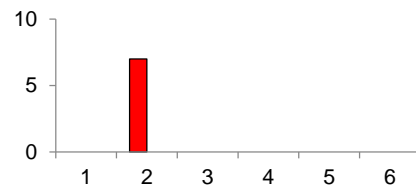

bin 4 – glycolysis

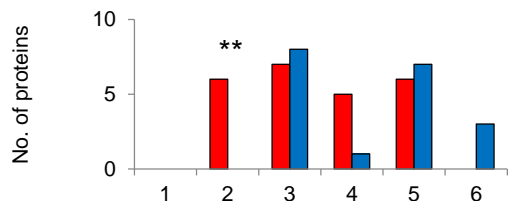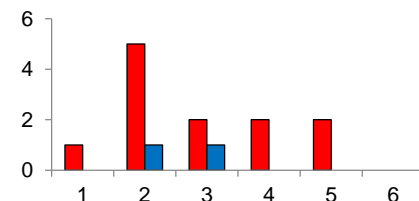

bin 5 – fermentation

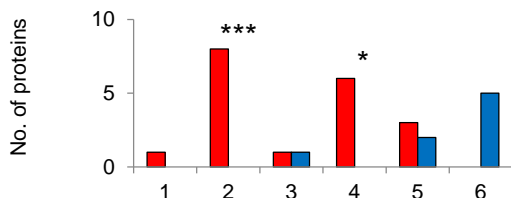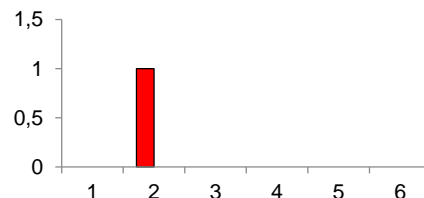

Figure S2. Distribution of differentially accumulated nonmodified and phosphorylated proteins between 6 tissue pairwise comparisons into 35 distinct MapMan bins. \*:  $p \leq 0.05$ ; \*\*:  $p \leq 0.01$ ; \*\*\*:  $p \leq 0.001$ . Compare Figure 2A and Figure S1A for color legend.

### Nonmodified proteins

### Phosphorylated proteins

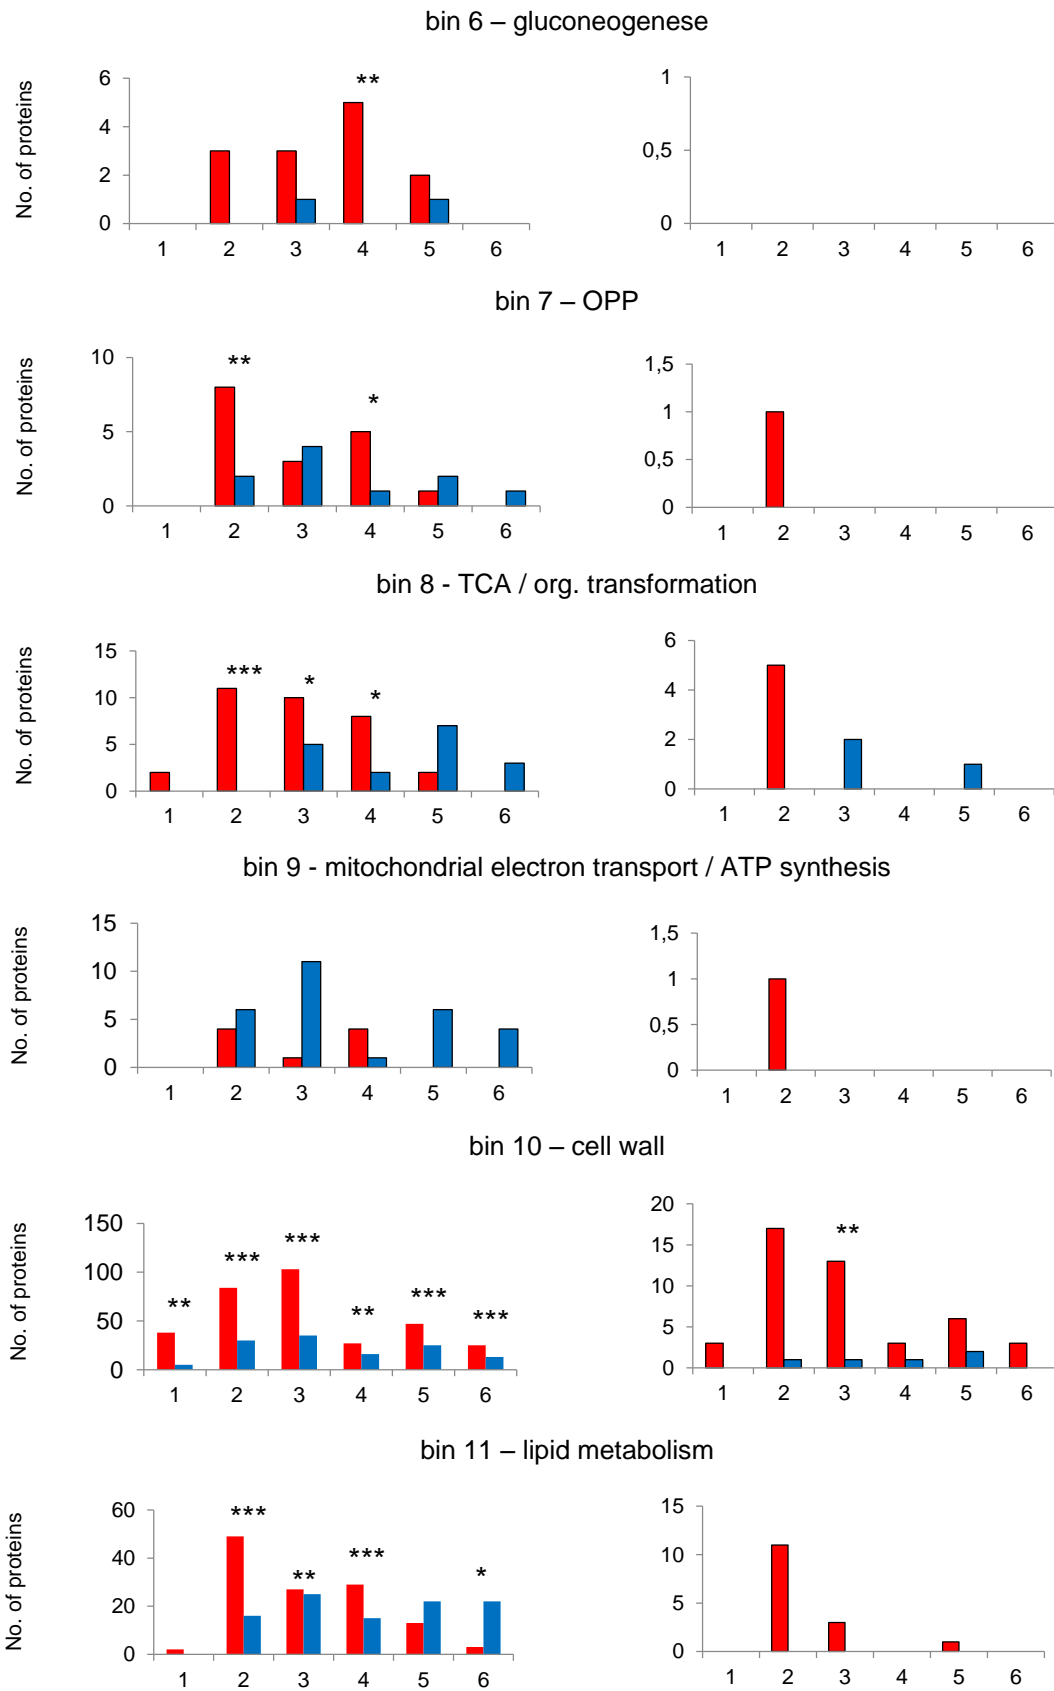

Figure S2 continued.

### Nonmodified proteins

### Phosphorylated proteins

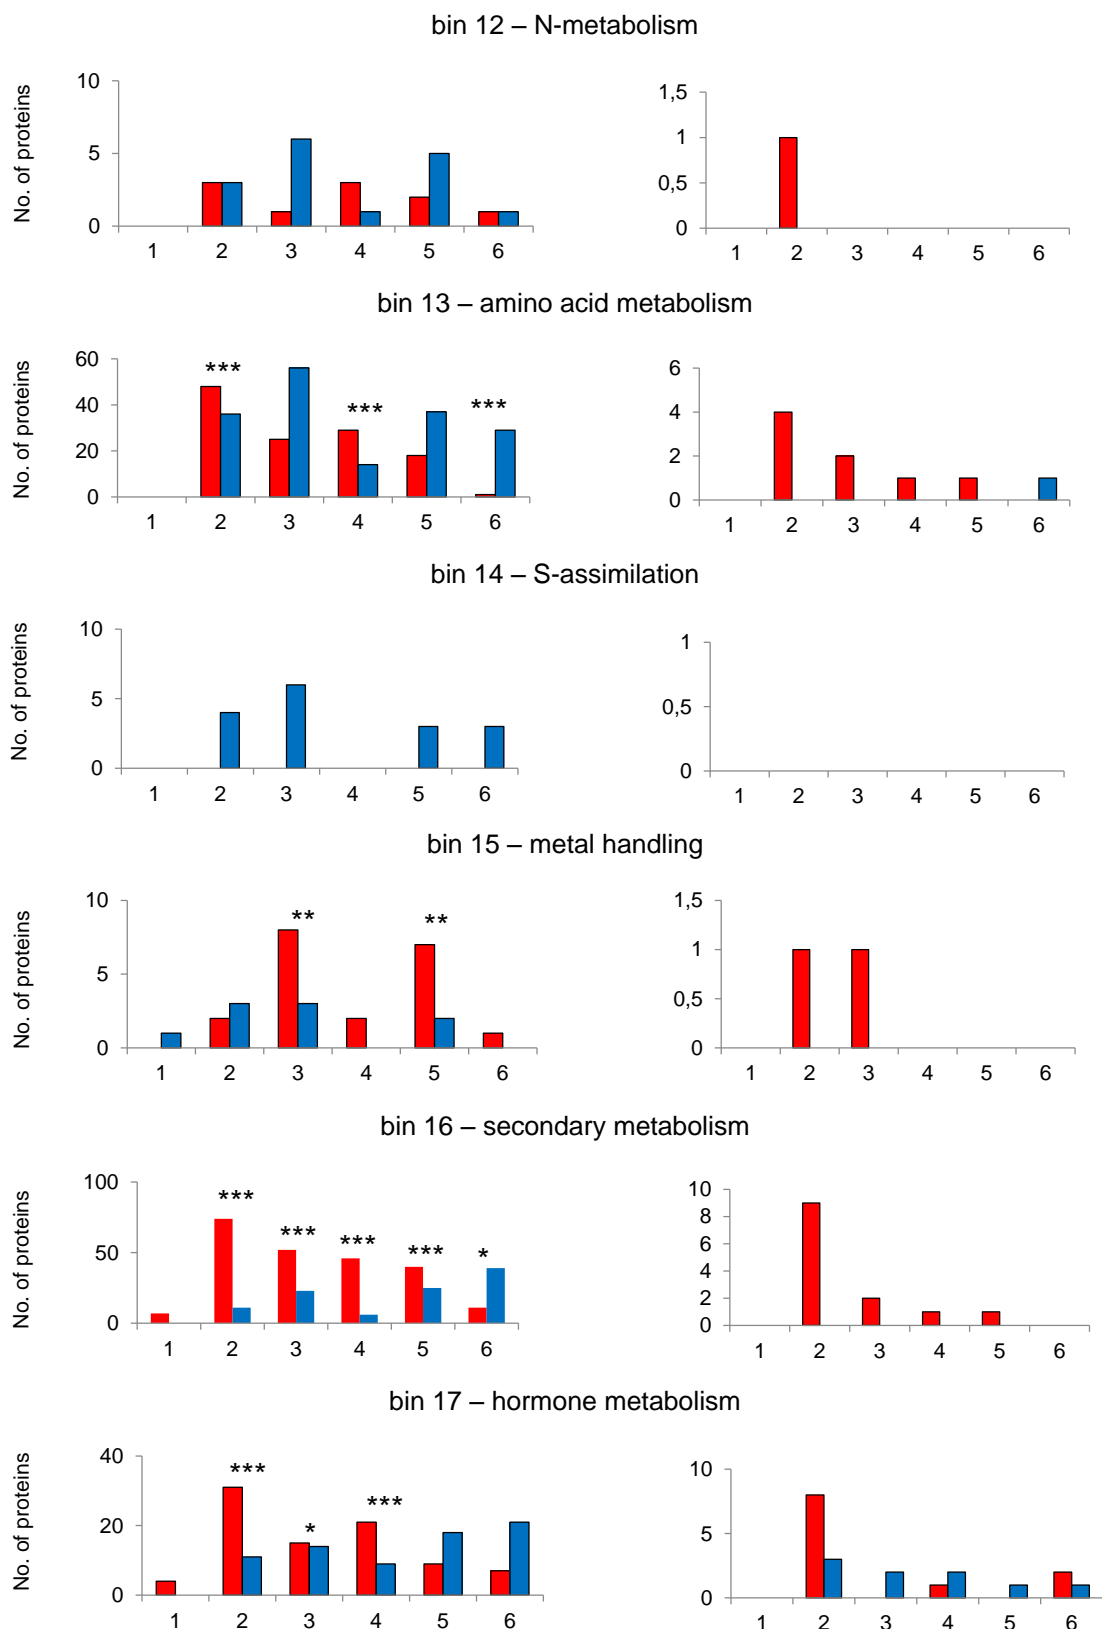

Figure S2 continued.

### Nonmodified proteins

### Phosphorylated proteins

bin 18 – Co-factor and vitamin metabolism

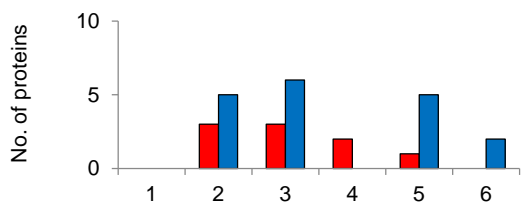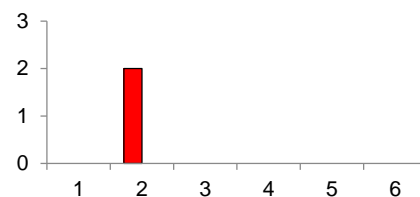

bin 19 - tetrapyrrole synthesis

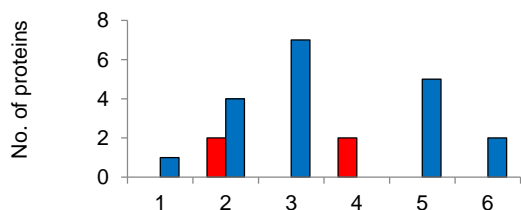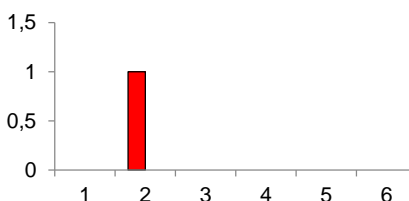

bin 20 – stress

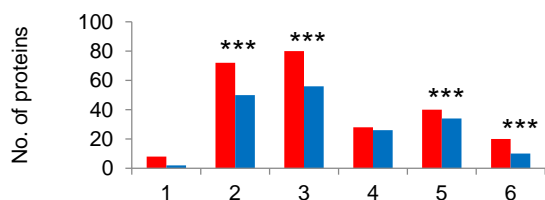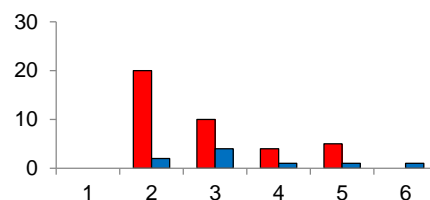

bin 21 – redox

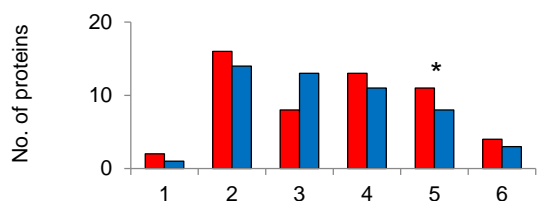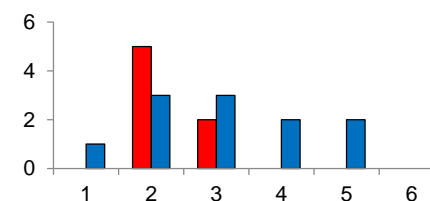

bin 22 – polyamine metabolism

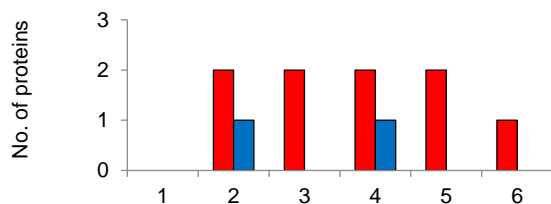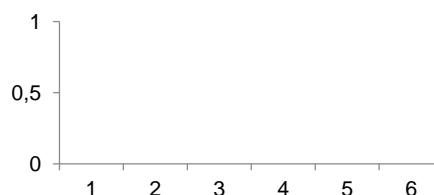

bin 23 – nucleotide metabolism

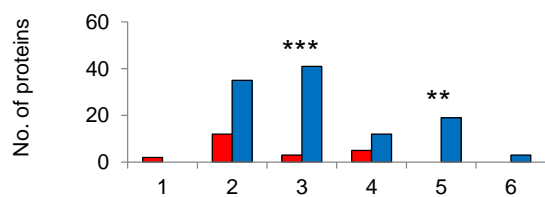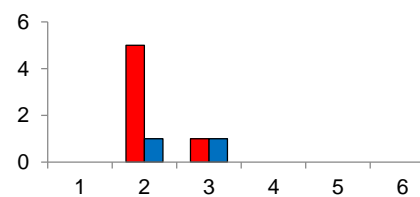

Figure S2 continued.

### Nonmodified proteins

### Phosphorylated proteins

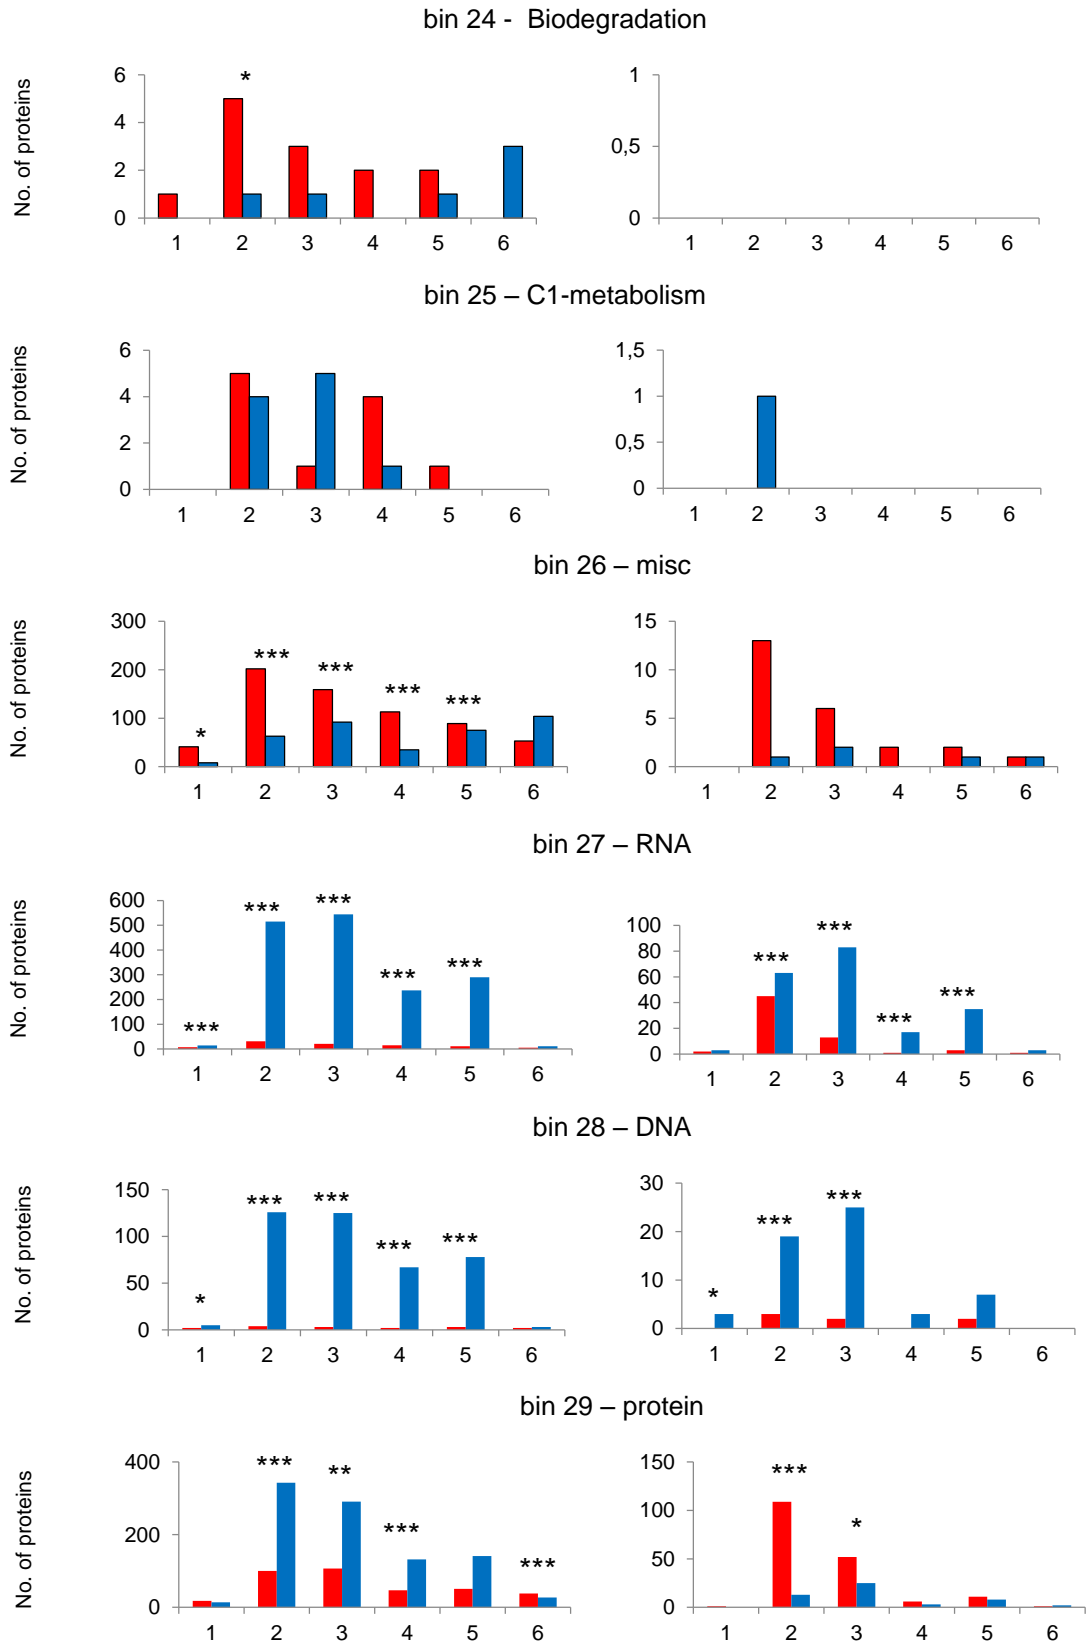

Figure S2 continued.

### Nonmodified proteins

### Phosphorylated proteins

#### bin 30 – signaling

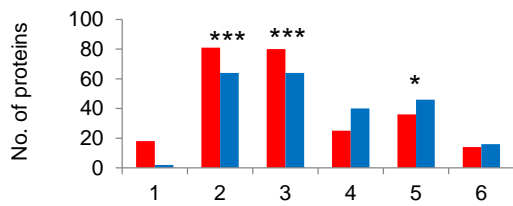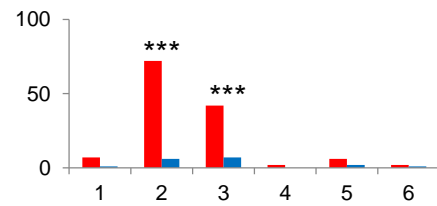

#### bin 31 – cell

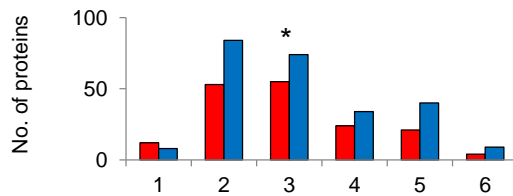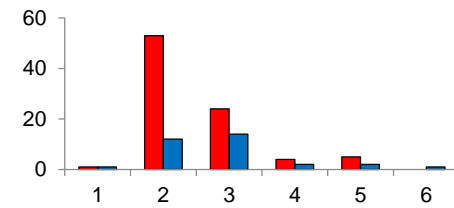

#### bin 32 – micro RNA

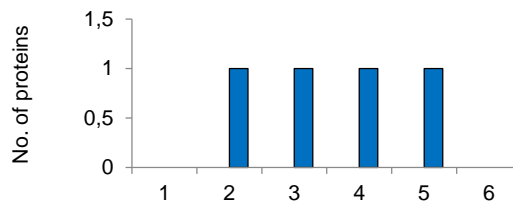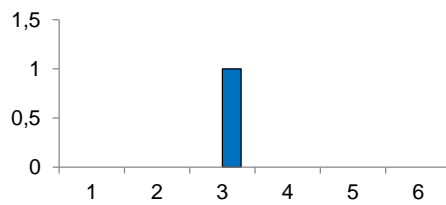

#### bin 33 – development

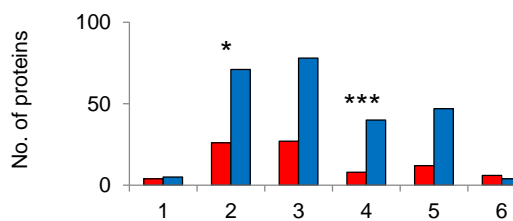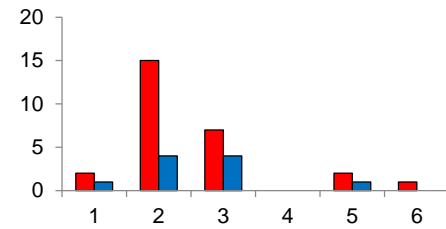

#### bin 34 – transport

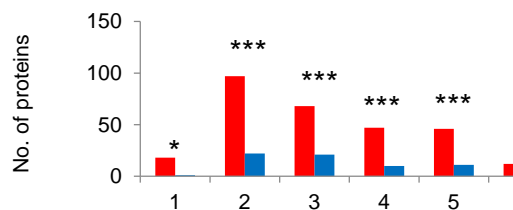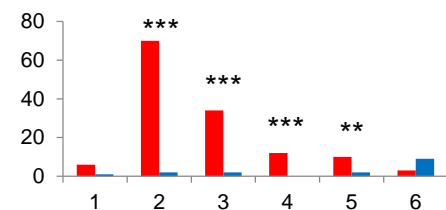

#### bin 35 – not assigned

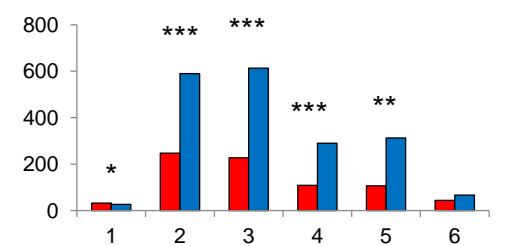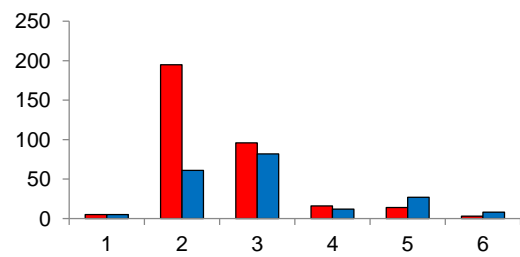

Figure S2 continued.
