# Supplementary material
Source: PubMed Central journal article supplement (PMC4424028)
Supplement: supp_pp.15.00138_00138R1_Supplemental_Table_S2.pdf [file supp_pp.15.00138_00138R1_Supplemental_Table_S2.pdf]

Table S2. Number of differentially accumulated proteins (FDR 5%) in the nonmodified and phosphorylated protein dataset.

| <b>Tissue comparison</b> | <b>Nonmodified proteins</b> | <b>Phosphorylated proteins</b> |
|--------------------------|-----------------------------|--------------------------------|
| MZ vs EZ                 | 326                         | 46                             |
| MZ < EZ                  | 231                         | 29                             |
| MZ > EZ                  | 95                          | 17                             |
| MZ vs C                  | 3,530                       | 919                            |
| MZ < C                   | 1,364                       | 722                            |
| MZ > C                   | 2,166                       | 197                            |
| MZ vs S                  | 3,474                       | 594                            |
| MZ < S                   | 1,157                       | 327                            |
| MZ > S                   | 2,317                       | 267                            |
| EZ vs C                  | 1,690                       | 105                            |
| EZ < C                   | 668                         | 60                             |
| EZ > C                   | 1,022                       | 45                             |
| EZ vs S                  | 1,917                       | 170                            |
| EZ < S                   | 600                         | 74                             |
| EZ > S                   | 1,317                       | 96                             |
| C vs S                   | 728                         | 46                             |
| C < S                    | 258                         | 18                             |
| C > S                    | 470                         | 28                             |
