# Supplementary material
Source: PubMed Central journal article supplement (PMC4424028)
Supplement: supp_pp.15.00138_00138R1_Supplemental_Table_S3.pdf [file supp_pp.15.00138_00138R1_Supplemental_Table_S3.pdf]

Table S3. Tissue-specific accumulation of "classical" maize proteins identified among nonmodified proteins.

| "Classical" maize gene ID | Meristematic zone | Elongation zone | Cortex | Stele |
|---------------------------|-------------------|-----------------|--------|-------|
| GRMZM2G003043             | x                 |                 |        |       |
| GRMZM2G157727             | x                 |                 |        |       |
| GRMZM2G073671             | x                 |                 |        |       |
| GRMZM2G035820             | x                 |                 |        |       |
| GRMZM2G034647             | x                 |                 |        |       |
| GRMZM2G402936             | x                 |                 |        |       |
| AC234157.1_FG002          | x                 |                 |        |       |
| GRMZM2G138060             | x                 |                 |        |       |
| GRMZM2G098520             | x                 |                 |        |       |
| AC199526.5_FG003          | x                 |                 |        |       |
| GRMZM2G021614             | x                 |                 |        |       |
| AC207722.2_FG009          | x                 |                 |        |       |
| GRMZM2G110309             |                   | x               |        |       |
| GRMZM2G136887             |                   | x               |        |       |
| GRMZM2G345717             |                   |                 | x      |       |
| GRMZM2G165390             |                   |                 | x      |       |
| GRMZM2G026930             |                   |                 | x      |       |
| GRMZM2G085661             |                   |                 | x      |       |
| GRMZM2G016241             |                   |                 | x      |       |
| GRMZM2G098239             |                   |                 | x      |       |
| GRMZM2G062396             |                   |                 | x      |       |
| GRMZM2G422750             |                   |                 | x      |       |
| GRMZM2G028041             |                   |                 | x      |       |
| GRMZM2G152891             |                   |                 | x      |       |
| GRMZM2G147266             |                   |                 |        | x     |
| GRMZM2G109987             |                   |                 |        | x     |
| GRMZM2G157820             | x                 | x               |        |       |
| GRMZM2G172132             | x                 | x               |        |       |
| GRMZM2G095239             | x                 | x               |        |       |
| GRMZM2G016671             | x                 | x               |        |       |
| GRMZM2G111906             | x                 | x               |        |       |
| GRMZM2G181362             | x                 |                 | x      |       |
| GRMZM2G148924             | x                 |                 |        | x     |
| GRMZM2G310115             |                   | x               | x      |       |
| GRMZM2G085924             |                   |                 | x      | x     |
| GRMZM2G085381             |                   |                 | x      | x     |
| GRMZM2G097768             |                   |                 | x      | x     |
| GRMZM2G005483             |                   |                 | x      | x     |
| GRMZM2G419806             | x                 | x               | x      |       |
| GRMZM2G129451             | x                 | x               | x      |       |
| GRMZM2G377215             | x                 | x               | x      |       |
| GRMZM2G044074             | x                 | x               | x      |       |
| GRMZM2G339563             | x                 | x               | x      |       |

Table S3 continued.

| <b>"Classical" maize gene ID</b> | <b>Meristematic zone</b> | <b>Elongation zone</b> | <b>Cortex</b> | <b>Stele</b> |
|----------------------------------|--------------------------|------------------------|---------------|--------------|
| GRMZM2G058310                    |                          | X                      | X             | X            |
| GRMZM2G155329                    |                          | X                      | X             | X            |
| GRMZM2G081192                    |                          | X                      | X             | X            |
| GRMZM2G117755                    |                          | X                      | X             | X            |
| AC234161.1_FG001                 |                          | X                      | X             | X            |
| GRMZM2G026703                    | X                        | X                      |               | X            |
| GRMZM2G155662                    | X                        | X                      |               | X            |
| GRMZM5G861678                    | X                        | X                      |               | X            |
| AC195340.3_FG001                 | X                        | X                      | X             | X            |
| AC196475.3_FG004                 | X                        | X                      | X             | X            |
| AC203535.4_FG001                 | X                        | X                      | X             | X            |
| AC205703.4_FG006                 | X                        | X                      | X             | X            |
| AC206941.2_FG002                 | X                        | X                      | X             | X            |
| AC209208.3_FG002                 | X                        | X                      | X             | X            |
| GRMZM2G005024                    | X                        | X                      | X             | X            |
| GRMZM2G007063                    | X                        | X                      | X             | X            |
| GRMZM2G008247                    | X                        | X                      | X             | X            |
| GRMZM2G009443                    | X                        | X                      | X             | X            |
| GRMZM2G010868                    | X                        | X                      | X             | X            |
| GRMZM2G011129                    | X                        | X                      | X             | X            |
| GRMZM2G012160                    | X                        | X                      | X             | X            |
| GRMZM2G014240                    | X                        | X                      | X             | X            |
| GRMZM2G014914                    | X                        | X                      | X             | X            |
| GRMZM2G015295                    | X                        | X                      | X             | X            |
| GRMZM2G016150                    | X                        | X                      | X             | X            |
| GRMZM2G016890                    | X                        | X                      | X             | X            |
| GRMZM2G017077                    | X                        | X                      | X             | X            |
| GRMZM2G018177                    | X                        | X                      | X             | X            |
| GRMZM2G018241                    | X                        | X                      | X             | X            |
| GRMZM2G018447                    | X                        | X                      | X             | X            |
| GRMZM2G018728                    | X                        | X                      | X             | X            |
| GRMZM2G019325                    | X                        | X                      | X             | X            |
| GRMZM2G019404                    | X                        | X                      | X             | X            |
| GRMZM2G020187                    | X                        | X                      | X             | X            |
| GRMZM2G023667                    | X                        | X                      | X             | X            |
| GRMZM2G024104                    | X                        | X                      | X             | X            |
| GRMZM2G025231                    | X                        | X                      | X             | X            |
| GRMZM2G025992                    | X                        | X                      | X             | X            |
| GRMZM2G026117                    | X                        | X                      | X             | X            |
| GRMZM2G027723                    | X                        | X                      | X             | X            |
| GRMZM2G028393                    | X                        | X                      | X             | X            |
| GRMZM2G030523                    | X                        | X                      | X             | X            |
| GRMZM2G032003                    | X                        | X                      | X             | X            |

Table S3 continued.

| <b>"Classical" maize gene ID</b> | <b>Meristematic zone</b> | <b>Elongation zone</b> | <b>Cortex</b> | <b>Stele</b> |
|----------------------------------|--------------------------|------------------------|---------------|--------------|
| GRMZM2G032315                    | X                        | X                      | X             | X            |
| GRMZM2G032628                    | X                        | X                      | X             | X            |
| GRMZM2G034157                    | X                        | X                      | X             | X            |
| GRMZM2G035017                    | X                        | X                      | X             | X            |
| GRMZM2G036464                    | X                        | X                      | X             | X            |
| GRMZM2G036609                    | X                        | X                      | X             | X            |
| GRMZM2G038636                    | X                        | X                      | X             | X            |
| GRMZM2G039155                    | X                        | X                      | X             | X            |
| GRMZM2G039454                    | X                        | X                      | X             | X            |
| GRMZM2G042992                    | X                        | X                      | X             | X            |
| GRMZM2G046191                    | X                        | X                      | X             | X            |
| GRMZM2G046804                    | X                        | X                      | X             | X            |
| GRMZM2G047368                    | X                        | X                      | X             | X            |
| GRMZM2G047855                    | X                        | X                      | X             | X            |
| GRMZM2G050514                    | X                        | X                      | X             | X            |
| GRMZM2G051637                    | X                        | X                      | X             | X            |
| GRMZM2G051943                    | X                        | X                      | X             | X            |
| GRMZM2G053458                    | X                        | X                      | X             | X            |
| GRMZM2G055489                    | X                        | X                      | X             | X            |
| GRMZM2G056014                    | X                        | X                      | X             | X            |
| GRMZM2G057000                    | X                        | X                      | X             | X            |
| GRMZM2G057243                    | X                        | X                      | X             | X            |
| GRMZM2G057823                    | X                        | X                      | X             | X            |
| GRMZM2G057935                    | X                        | X                      | X             | X            |
| GRMZM2G058292                    | X                        | X                      | X             | X            |
| GRMZM2G058522                    | X                        | X                      | X             | X            |
| GRMZM2G058675                    | X                        | X                      | X             | X            |
| GRMZM2G059991                    | X                        | X                      | X             | X            |
| GRMZM2G063756                    | X                        | X                      | X             | X            |
| GRMZM2G064302                    | X                        | X                      | X             | X            |
| GRMZM2G066191                    | X                        | X                      | X             | X            |
| GRMZM2G067176                    | X                        | X                      | X             | X            |
| GRMZM2G067511                    | X                        | X                      | X             | X            |
| GRMZM2G067546                    | X                        | X                      | X             | X            |
| GRMZM2G067919                    | X                        | X                      | X             | X            |
| GRMZM2G071790                    | X                        | X                      | X             | X            |
| GRMZM2G071959                    | X                        | X                      | X             | X            |
| GRMZM2G073054                    | X                        | X                      | X             | X            |
| GRMZM2G074361                    | X                        | X                      | X             | X            |
| GRMZM2G074604                    | X                        | X                      | X             | X            |
| GRMZM2G079348                    | X                        | X                      | X             | X            |
| GRMZM2G079440                    | X                        | X                      | X             | X            |
| GRMZM2G080603                    | X                        | X                      | X             | X            |

Table S3 continued.

| <b>"Classical" maize gene ID</b> | <b>Meristematic zone</b> | <b>Elongation zone</b> | <b>Cortex</b> | <b>Stele</b> |
|----------------------------------|--------------------------|------------------------|---------------|--------------|
| GRMZM2G081843                    | x                        | x                      | x             | x            |
| GRMZM2G083459                    | x                        | x                      | x             | x            |
| GRMZM2G083810                    | x                        | x                      | x             | x            |
| GRMZM2G083841                    | x                        | x                      | x             | x            |
| GRMZM2G085019                    | x                        | x                      | x             | x            |
| GRMZM2G086971                    | x                        | x                      | x             | x            |
| GRMZM2G087186                    | x                        | x                      | x             | x            |
| GRMZM2G088212                    | x                        | x                      | x             | x            |
| GRMZM2G088753                    | x                        | x                      | x             | x            |
| GRMZM2G089713                    | x                        | x                      | x             | x            |
| GRMZM2G089836                    | x                        | x                      | x             | x            |
| GRMZM2G090422                    | x                        | x                      | x             | x            |
| GRMZM2G090568                    | x                        | x                      | x             | x            |
| GRMZM2G090718                    | x                        | x                      | x             | x            |
| GRMZM2G091481                    | x                        | x                      | x             | x            |
| GRMZM2G092125                    | x                        | x                      | x             | x            |
| GRMZM2G096475                    | x                        | x                      | x             | x            |
| GRMZM2G098290                    | x                        | x                      | x             | x            |
| GRMZM2G098298                    | x                        | x                      | x             | x            |
| GRMZM2G098346                    | x                        | x                      | x             | x            |
| GRMZM2G099056                    | x                        | x                      | x             | x            |
| GRMZM2G099167                    | x                        | x                      | x             | x            |
| GRMZM2G101480                    | x                        | x                      | x             | x            |
| GRMZM2G101958                    | x                        | x                      | x             | x            |
| GRMZM2G102499                    | x                        | x                      | x             | x            |
| GRMZM2G104325                    | x                        | x                      | x             | x            |
| GRMZM2G104546                    | x                        | x                      | x             | x            |
| GRMZM2G104843                    | x                        | x                      | x             | x            |
| GRMZM2G108766                    | x                        | x                      | x             | x            |
| GRMZM2G109130                    | x                        | x                      | x             | x            |
| GRMZM2G109818                    | x                        | x                      | x             | x            |
| GRMZM2G111642                    | x                        | x                      | x             | x            |
| GRMZM2G111903                    | x                        | x                      | x             | x            |
| GRMZM2G112240                    | x                        | x                      | x             | x            |
| GRMZM2G112336                    | x                        | x                      | x             | x            |
| GRMZM2G113137                    | x                        | x                      | x             | x            |
| GRMZM2G114793                    | x                        | x                      | x             | x            |
| GRMZM2G116204                    | x                        | x                      | x             | x            |
| GRMZM2G116273                    | x                        | x                      | x             | x            |
| GRMZM2G117935                    | x                        | x                      | x             | x            |
| GRMZM2G119071                    | x                        | x                      | x             | x            |
| GRMZM2G119809                    | x                        | x                      | x             | x            |
| GRMZM2G120047                    | x                        | x                      | x             | x            |

Table S3 continued.

| <b>"Classical" maize gene ID</b> | <b>Meristematic zone</b> | <b>Elongation zone</b> | <b>Cortex</b> | <b>Stele</b> |
|----------------------------------|--------------------------|------------------------|---------------|--------------|
| GRMZM2G121468                    | x                        | x                      | x             | x            |
| GRMZM2G122871                    | x                        | x                      | x             | x            |
| GRMZM2G124532                    | x                        | x                      | x             | x            |
| GRMZM2G126010                    | x                        | x                      | x             | x            |
| GRMZM2G134797                    | x                        | x                      | x             | x            |
| GRMZM2G135186                    | x                        | x                      | x             | x            |
| GRMZM2G136067                    | x                        | x                      | x             | x            |
| GRMZM2G139300                    | x                        | x                      | x             | x            |
| GRMZM2G143602                    | x                        | x                      | x             | x            |
| GRMZM2G144030                    | x                        | x                      | x             | x            |
| GRMZM2G145715                    | x                        | x                      | x             | x            |
| GRMZM2G146246                    | x                        | x                      | x             | x            |
| GRMZM2G152466                    | x                        | x                      | x             | x            |
| GRMZM2G152908                    | x                        | x                      | x             | x            |
| GRMZM2G154595                    | x                        | x                      | x             | x            |
| GRMZM2G154628                    | x                        | x                      | x             | x            |
| GRMZM2G154954                    | x                        | x                      | x             | x            |
| GRMZM2G155242                    | x                        | x                      | x             | x            |
| GRMZM2G156861                    | x                        | x                      | x             | x            |
| GRMZM2G164696                    | x                        | x                      | x             | x            |
| GRMZM2G165901                    | x                        | x                      | x             | x            |
| GRMZM2G165917                    | x                        | x                      | x             | x            |
| GRMZM2G167549                    | x                        | x                      | x             | x            |
| GRMZM2G168651                    | x                        | x                      | x             | x            |
| GRMZM2G168681                    | x                        | x                      | x             | x            |
| GRMZM2G169593                    | x                        | x                      | x             | x            |
| GRMZM2G172322                    | x                        | x                      | x             | x            |
| GRMZM2G172491                    | x                        | x                      | x             | x            |
| GRMZM2G175423                    | x                        | x                      | x             | x            |
| GRMZM2G177098                    | x                        | x                      | x             | x            |
| GRMZM2G177631                    | x                        | x                      | x             | x            |
| GRMZM2G178415                    | x                        | x                      | x             | x            |
| GRMZM2G178693                    | x                        | x                      | x             | x            |
| GRMZM2G180625                    | x                        | x                      | x             | x            |
| GRMZM2G305046                    | x                        | x                      | x             | x            |
| GRMZM2G310431                    | x                        | x                      | x             | x            |
| GRMZM2G316113                    | x                        | x                      | x             | x            |
| GRMZM2G325575                    | x                        | x                      | x             | x            |
| GRMZM2G333916                    | x                        | x                      | x             | x            |
| GRMZM2G334899                    | x                        | x                      | x             | x            |
| GRMZM2G337229                    | x                        | x                      | x             | x            |
| GRMZM2G339122                    | x                        | x                      | x             | x            |
| GRMZM2G340251                    | x                        | x                      | x             | x            |

Table S3 continued.

| <b>"Classical" maize gene ID</b> | <b>Meristematic zone</b> | <b>Elongation zone</b> | <b>Cortex</b> | <b>Stele</b> |
|----------------------------------|--------------------------|------------------------|---------------|--------------|
| GRMZM2G358059                    | x                        | x                      | x             | x            |
| GRMZM2G360681                    | x                        | x                      | x             | x            |
| GRMZM2G364069                    | x                        | x                      | x             | x            |
| GRMZM2G365423                    | x                        | x                      | x             | x            |
| GRMZM2G381395                    | x                        | x                      | x             | x            |
| GRMZM2G392975                    | x                        | x                      | x             | x            |
| GRMZM2G394450                    | x                        | x                      | x             | x            |
| GRMZM2G415359                    | x                        | x                      | x             | x            |
| GRMZM2G424053                    | x                        | x                      | x             | x            |
| GRMZM2G438551                    | x                        | x                      | x             | x            |
| GRMZM2G440614                    | x                        | x                      | x             | x            |
| GRMZM2G442658                    | x                        | x                      | x             | x            |
| GRMZM2G456626                    | x                        | x                      | x             | x            |
| GRMZM2G458208                    | x                        | x                      | x             | x            |
| GRMZM2G473001                    | x                        | x                      | x             | x            |
| GRMZM2G702426                    | x                        | x                      | x             | x            |
| GRMZM5G833389                    | x                        | x                      | x             | x            |
| GRMZM5G834758                    | x                        | x                      | x             | x            |
| GRMZM5G835323                    | x                        | x                      | x             | x            |
| GRMZM5G836910                    | x                        | x                      | x             | x            |
| GRMZM5G844562                    | x                        | x                      | x             | x            |
| GRMZM5G844723                    | x                        | x                      | x             | x            |
| GRMZM5G849107                    | x                        | x                      | x             | x            |
| GRMZM5G858094                    | x                        | x                      | x             | x            |
| GRMZM5G872068                    | x                        | x                      | x             | x            |
| GRMZM5G898735                    | x                        | x                      | x             | x            |
| GRMZM5G899349                    | x                        | x                      | x             | x            |
