# Supplementary material
Source: PubMed Central journal article supplement (PMC4424028)
Supplement: supp_pp.15.00138_00138R1_Supplemental_Table_S4.pdf [file supp_pp.15.00138_00138R1_Supplemental_Table_S4.pdf]

Table S4. Singular enrichment analysis (SEA) of proteins being organ-specifically accumulated among nonmodified proteins of maize. As reference 16,680 unique nonmodified proteins were used.

| Overrepresented GO terms of root-specific nonmodified proteins |                                                                                                   |                                                  |                                                         |                     |          |          |         |
|----------------------------------------------------------------|---------------------------------------------------------------------------------------------------|--------------------------------------------------|---------------------------------------------------------|---------------------|----------|----------|---------|
| GO Term                                                        | Ontology                                                                                          | Description                                      | Number in input list                                    | Number in reference | p-value  | FDR      |         |
| GO:0042221                                                     | Biological process (p)                                                                            | Response to chemical stimulus                    | 57                                                      | 194                 | 3.5e-15  | 4.9e-12  |         |
| GO:0006979                                                     |                                                                                                   | Response to oxidative stress                     | 45                                                      | 134                 | 1.1e-14  | 7.5e-12  |         |
| GO:0009808                                                     |                                                                                                   | Lignin metabolic process                         | 6                                                       | 7                   | 4,00e-06 | 0.0011   |         |
| GO:0046274                                                     |                                                                                                   | Lignin catabolic process                         | 6                                                       | 7                   | 4,00e-06 | 0.0011   |         |
| GO:0046271                                                     |                                                                                                   | Phenylpropanoid catabolic process                | 6                                                       | 7                   | 4,00E-06 | 0.0011   |         |
| GO:0042219                                                     |                                                                                                   | Cellular amino acid derivative catabolic process | 6                                                       | 8                   | 1.5e-05  | 0.0034   |         |
| GO:0012501                                                     |                                                                                                   | Programmed cell death                            | 11                                                      | 30                  | 4.3e-05  | 0.0068   |         |
| GO:0042546                                                     |                                                                                                   | Cell wall biogenesis                             | 6                                                       | 9                   | 4.1e-05  | 0.0068   |         |
| GO:0006915                                                     |                                                                                                   | Apoptosis                                        | 11                                                      | 30                  | 4.3e-05  | 0.0068   |         |
| GO:0050896                                                     |                                                                                                   | Response to stimulus                             | 103                                                     | 752                 | 7.4e-05  | 0.01     |         |
| GO:0071554                                                     |                                                                                                   | Cell wall organization or biogenesis             | 17                                                      | 68                  | 0.00012  | 0.015    |         |
| GO:0009698                                                     |                                                                                                   | Phenylpropanoid metabolic process                | 6                                                       | 11                  | 0.00019  | 0.022    |         |
| GO:0016265                                                     |                                                                                                   | Death                                            | 11                                                      | 36                  | 0.00028  | 0.028    |         |
| GO:0008219                                                     |                                                                                                   | Cell death                                       | 11                                                      | 36                  | 0.00028  | 0.028    |         |
| GO:0070882                                                     |                                                                                                   | Cellular cell wall organization or biogenesis    | 6                                                       | 12                  | 0.00035  | 0.033    |         |
| GO:0006950                                                     |                                                                                                   | Response to stress                               | 90                                                      | 675                 | 0.00044  | 0.038    |         |
| GO:0019439                                                     |                                                                                                   | Aromatic compound catabolic process              | 7                                                       | 17                  | 0.00048  | 0.04     |         |
| GO:0016684                                                     |                                                                                                   | Molecular function (f)                           | Oxidoreductase activity, acting on peroxide as acceptor | 46                  | 141      | 1.9e-14  | 8.5e-12 |
| GO:0004601                                                     |                                                                                                   |                                                  | Peroxidase activity                                     | 46                  | 141      | 1.9e-14  | 8.5e-12 |
| GO:0020037                                                     |                                                                                                   |                                                  | Heme binding                                            | 69                  | 283      | 1.6e-13  | 3.5e-11 |
| GO:0046906                                                     | Tetrapyrrole binding                                                                              |                                                  | 69                                                      | 283                 | 1.6e-13  | 3.5e-11  |         |
| GO:0016209                                                     | Antioxidant activity                                                                              |                                                  | 46                                                      | 155                 | 8.6e-13  | 1.6e-10  |         |
| GO:0009055                                                     | Electron carrier activity                                                                         |                                                  | 88                                                      | 471                 | 5.2e-10  | 7.9e-08  |         |
| GO:0005506                                                     | Iron ion binding                                                                                  |                                                  | 74                                                      | 383                 | 2.3e-09  | 3,00E-07 |         |
| GO:0016757                                                     | Transferase activity, transferring glycosyl groups                                                |                                                  | 54                                                      | 298                 | 1.9e-06  | 0.00022  |         |
| GO:0008417                                                     | Fucosyltransferase activity                                                                       |                                                  | 6                                                       | 7                   | 4,00E-06 | 0.0003   |         |
| GO:0008107                                                     | Galactoside 2-alpha-L-fucosyltransferase activity                                                 |                                                  | 6                                                       | 7                   | 4,00E-06 | 0.0003   |         |
| GO:0031127                                                     | Alpha(1,2)-fucosyltransferase activity                                                            |                                                  | 6                                                       | 7                   | 4,00E-06 | 0.0003   |         |
| GO:0008471                                                     | Laccase activity                                                                                  |                                                  | 6                                                       | 7                   | 4,00E-06 | 0.0003   |         |
| GO:0005507                                                     | Copper ion binding                                                                                |                                                  | 17                                                      | 58                  | 1.3e-05  | 0.0009   |         |
| GO:0016758                                                     | Transferase activity, transferring hexosyl groups                                                 |                                                  | 42                                                      | 229                 | 1.7e-05  | 0.0011   |         |
| GO:0016491                                                     | Oxidoreductase activity                                                                           |                                                  | 134                                                     | 999                 | 2.4e-05  | 0.0014   |         |
| GO:0046914                                                     | Transition metal ion binding                                                                      |                                                  | 154                                                     | 1180                | 2.9e-05  | 0.0016   |         |
| GO:0016682                                                     | Oxidoreductase activity, acting on diphenols and related substances as donors, oxygen as acceptor |                                                  | 6                                                       | 9                   | 4.1e-05  | 0.0022   |         |
| GO:0046872                                                     | Metal ion binding                                                                                 |                                                  | 181                                                     | 1472                | 0.00016  | 0.0079   |         |
| GO:0043167                                                     | ion binding                                                                                       |                                                  | 181                                                     | 1475                | 0.00018  | 0.0079   |         |
| GO:0043169                                                     | cation binding                                                                                    |                                                  | 181                                                     | 1475                | 0.00018  | 0.0079   |         |
| GO:0016762                                                     | xyloglucan:xyloglucosyl transferase activity                                                      | 8                                                | 20                                                      | 0.00024             | 0.01     |          |         |
| GO:0016740                                                     | transferase activity                                                                              | 192                                              | 1623                                                    | 0.00067             | 0.028    |          |         |
| GO:0005576                                                     | Cellular component (c)                                                                            | extracellular region                             | 40                                                      | 149                 | 6.6e-10  | 1.1e-07  |         |
| GO:0048046                                                     |                                                                                                   | apoplast                                         | 15                                                      | 40                  | 1.3e-06  | 0.00011  |         |

Table S4 continued.

| Overrepresented GO terms of seed-specific nonmodified proteins |                                              |                                                                                     |                               |                  |          |          |         |
|----------------------------------------------------------------|----------------------------------------------|-------------------------------------------------------------------------------------|-------------------------------|------------------|----------|----------|---------|
| GO term                                                        | Ontology                                     | Description                                                                         | Number in input list          | Number in BG/Ref | p-value  | FDR      |         |
| GO:0006952                                                     | Biological process (p)                       | Defense response                                                                    | 16                            | 35               | 1.7e-06  | 0.0029   |         |
| GO:0010556                                                     |                                              | Regulation of macromolecule biosynthetic process                                    | 104                           | 561              | 7.5e-05  | 0.021    |         |
| GO:0009889                                                     |                                              | Regulation of biosynthetic process                                                  | 104                           | 561              | 7.5e-05  | 0.021    |         |
| GO:0031326                                                     |                                              | Regulation of cellular biosynthetic process                                         | 104                           | 561              | 7.5e-05  | 0.021    |         |
| GO:0031323                                                     |                                              | Regulation of cellular metabolic process                                            | 105                           | 569              | 8.4e-05  | 0.021    |         |
| GO:0045449                                                     |                                              | Regulation of transcription                                                         | 102                           | 545              | 6.00E-05 | 0.021    |         |
| GO:0010468                                                     |                                              | Regulation of gene expression                                                       | 106                           | 565              | 4.1e-05  | 0.021    |         |
| GO:0019219                                                     |                                              | Regulation of nucleobase, nucleoside, nucleotide and nucleic acid metabolic process | 102                           | 554              | 0.00011  | 0.021    |         |
| GO:0051171                                                     |                                              | Regulation of nitrogen compound metabolic process                                   | 102                           | 554              | 0.00011  | 0.021    |         |
| GO:0080090                                                     |                                              | Regulation of primary metabolic process                                             | 108                           | 609              | 0.00031  | 0.049    |         |
| GO:0060255                                                     |                                              | Regulation of macromolecule metabolic process                                       | 110                           | 621              | 0.00029  | 0.049    |         |
| GO:0004497                                                     |                                              | Molecular function (f)                                                              | Monooxygenase activity        | 38               | 147      | 1.4e-05  | 0.0062  |
| GO:0003700                                                     |                                              |                                                                                     | Transcription factor activity | 47               | 191      | 6.4e-06  | 0.0062  |
| GO:0030528                                                     | Transcription regulator activity             |                                                                                     | 71                            | 337              | 1.6e-05  | 0.0062   |         |
| GO:0043565                                                     | Sequence-specific DNA binding                |                                                                                     | 43                            | 186              | 7.3e-05  | 0.014    |         |
| GO:0004867                                                     | Serine-type endopeptidase inhibitor activity |                                                                                     | 12                            | 28               | 7.4e-05  | 0.014    |         |
| GO:0045735                                                     | Nutrient reservoir activity                  |                                                                                     | 15                            | 40               | 6.3e-05  | 0.014    |         |
| GO:0004866                                                     | Endopeptidase inhibitor activity             |                                                                                     | 14                            | 41               | 0.00034  | 0.05     |         |
| GO:0030414                                                     | Peptidase inhibitor activity                 |                                                                                     | 14                            | 41               | 0.00034  | 0.05     |         |
|                                                                |                                              |                                                                                     |                               |                  |          |          |         |
| Overrepresented GO terms of leaf-specific nonmodified proteins |                                              |                                                                                     |                               |                  |          |          |         |
| GO term                                                        | Ontology                                     | Description                                                                         | Number in input list          | Number in BG/Ref | p-value  | FDR      |         |
| GO:0015979                                                     | Biological process (p)                       | Photosynthesis                                                                      | 50                            | 67               | 9.5e-37  | 1.2e-33  |         |
| GO:0019684                                                     |                                              | Photosynthesis, light reaction                                                      | 24                            | 30               | 1.00E-19 | 6.4e-17  |         |
| GO:0009765                                                     |                                              | Photosynthesis, light harvesting                                                    | 20                            | 23               | 4.7e-18  | 2.00E-15 |         |
| GO:0065007                                                     |                                              | Biological regulation                                                               | 183                           | 1322             | 7.6e-07  | 0.00024  |         |
| GO:0006091                                                     |                                              | Generation of precursor metabolites and energy                                      | 46                            | 243              | 5.3e-06  | 0.0013   |         |
| GO:0042592                                                     |                                              | Homeostatic process                                                                 | 76                            | 496              | 3.00E-05 | 0.0064   |         |
| GO:0050789                                                     |                                              | Regulation of biological process                                                    | 123                           | 895              | 3.9e-05  | 0.0071   |         |
| GO:0065008                                                     |                                              | Regulation of biological quality                                                    | 77                            | 515              | 6.1e-05  | 0.0097   |         |
| GO:0050794                                                     |                                              | Regulation of cellular process                                                      | 113                           | 828              | 9.6e-05  | 0.014    |         |
| GO:0009628                                                     |                                              | Response to abiotic stimulus                                                        | 63                            | 422              | 0.00026  | 0.033    |         |
| GO:0048871                                                     |                                              | Multicellular organismal homeostasis                                                | 59                            | 398              | 0.00046  | 0.034    |         |
| GO:0022402                                                     |                                              | Cell cycle process                                                                  | 6                             | 12               | 0.00039  | 0.034    |         |
| GO:0050826                                                     |                                              | Response to freezing                                                                | 59                            | 398              | 0.00046  | 0.034    |         |
| GO:0042309                                                     |                                              | Homiothermy                                                                         | 59                            | 398              | 0.00046  | 0.034    |         |
| GO:0009409                                                     |                                              | Response to cold                                                                    | 59                            | 398              | 0.00046  | 0.034    |         |
| GO:0001659                                                     |                                              | Temperature homeostasis                                                             | 59                            | 398              | 0.00046  | 0.034    |         |
| GO:0010468                                                     |                                              | Regulation of gene expression                                                       | 79                            | 565              | 0.00041  | 0.034    |         |
| GO:0009266                                                     |                                              | Response to temperature stimulus                                                    | 59                            | 399              | 0.00049  | 0.035    |         |
| GO:0019222                                                     |                                              | Regulation of metabolic process                                                     | 85                            | 627              | 0.00068  | 0.045    |         |
| GO:0008152                                                     |                                              | Metabolic process                                                                   | 552                           | 4982             | 0.00079  | 0.047    |         |
| GO:0031323                                                     |                                              | Regulation of cellular metabolic process                                            | 78                            | 569              | 0.00078  | 0.047    |         |
| GO:0045449                                                     |                                              | Regulation of transcription                                                         | 75                            | 545              | 0.00086  | 0.047    |         |
| GO:0044237                                                     |                                              | Cellular metabolic process                                                          | 404                           | 3583             | 0.00085  | 0.047    |         |
| GO:0034357                                                     |                                              | Cellular component (c)                                                              | Photosynthetic membrane       | 30               | 35       | 4.9e-26  | 1.3e-23 |
| GO:0009579                                                     |                                              |                                                                                     | Thylakoid                     | 30               | 36       | 2.7e-25  | 3.6e-23 |
| GO:0009521                                                     |                                              |                                                                                     | Photosystem                   | 24               | 26       | 8.1e-23  | 7.3e-21 |
| GO:0044436                                                     |                                              |                                                                                     | Thylakoid part                | 19               | 23       | 2.2e-16  | 1.5e-14 |
| GO:0009523                                                     |                                              |                                                                                     | Photosystem II                | 13               | 14       | 6.2e-13  | 3.4e-11 |
| GO:0009522                                                     |                                              |                                                                                     | Photosystem I                 | 11               | 12       | 5.9e-11  | 2.3e-09 |
| GO:0009654                                                     |                                              |                                                                                     | Oxygen evolving complex       | 11               | 12       | 5.9e-11  | 2.3e-09 |
|                                                                |                                              |                                                                                     |                               |                  |          |          |         |

Table S4 continued.

| Overrepresented GO terms of leaf-specific nonmodified proteins |                           |                               |                      |                  |          |          |
|----------------------------------------------------------------|---------------------------|-------------------------------|----------------------|------------------|----------|----------|
| GO term                                                        | Ontology                  | Description                   | Number in input list | Number in BG/Ref | p-value  | FDR      |
| GO:0019898                                                     | Cellular component<br>(c) | Extrinsic to membrane         | 9                    | 11               | 2.8e-08  | 9.3e-07  |
| GO:0042651                                                     |                           | Thylakoid membrane            | 9                    | 12               | 1,00E-07 | 3,00E-06 |
| GO:0009538                                                     |                           | Photosystem I reaction center | 6                    | 7                | 4.5e-06  | 0.00012  |
| GO:0009536                                                     |                           | Plastid                       | 8                    | 19               | 0.00018  | 0.0045   |
| GO:0043229                                                     |                           | Intracellular organelle       | 195                  | 1648             | 0.0015   | 0.031    |
| GO:0043226                                                     |                           | Organelle                     | 195                  | 1648             | 0.0015   | 0.031    |
